## 1 **Plant-on-Chip: core morphogenesis processes in the tiny plant *Wolffia australiana***

2 Feng Li<sup>a,b,c,d,1</sup>, Jing-Jing Yang<sup>e,1</sup>, Zong-Yi Sun<sup>f,1</sup>, Lei Wang<sup>g,1</sup>, Le-Yao Qi<sup>a</sup>, Sina A<sup>a</sup>, Yi-Qun  
3 Liu<sup>d</sup>, Hong-Mei Zhang<sup>d</sup>, Lei-Fan Dang<sup>d</sup>, Shu-Jing Wang<sup>b</sup>, Chun-Xiong Luo<sup>b</sup>, Wei-Feng Nian<sup>a</sup>,  
4 Seth O’Conner<sup>g</sup>, Long-Zhen Ju<sup>f</sup>, Wei-Peng Quan<sup>f</sup>, Xiao-Kang Li<sup>f</sup>, Chao Wang<sup>f</sup>, De-Peng  
5 Wang<sup>f</sup>, Han-Li You<sup>h</sup>, Zhu-Kuan Cheng<sup>h</sup>, Jia Yan<sup>d</sup>, Fu-Chou Tang<sup>d</sup>, De-Chang Yang<sup>c,d,i,j</sup>, Chu-  
6 Wei Xia<sup>c,d,i,j</sup>, Ge Gao<sup>c,d,i,j</sup>, Yan Wang<sup>h</sup>, Bao-Cai Zhang<sup>h</sup>, Yi-Hua Zhou<sup>h</sup>, Xing Guo<sup>k</sup>, Sun-Huan  
7 Xiang<sup>k</sup>, Huan Liu<sup>k</sup>, Tian-Bo Peng<sup>c,d</sup>, Xiao-Dong Su<sup>c,d</sup>, Yong Chen<sup>l</sup>, Qi Ouyang<sup>b,m</sup>, Dong-Hui  
8 Wang<sup>c,d</sup>, Da-Ming Zhang<sup>n</sup>, Zhi-Hong Xu<sup>c,d</sup>, Hong-Wei Hou<sup>e,2</sup>, Shu-Nong Bai<sup>b,c,d,2</sup> and Ling  
9 Li<sup>g,2</sup>

10

11 Author affiliations: <sup>a</sup>The High School Affiliated to Renmin University of China, Beijing  
12 100080, China; <sup>b</sup>Center of Quantitative Biology, Peking University, Beijing 100871, China;  
13 <sup>c</sup>State Key Laboratory of Protein & Plant Gene Research, Peking University, Beijing 100871,  
14 China; <sup>d</sup>College of Life Sciences, Peking University, Beijing 100871, China; <sup>e</sup>Institute of  
15 Hydrobiology, Chinese Academy of Sciences, Wuhan 430072, China; <sup>f</sup>GrandOmics  
16 Biosciences Ltd., Wuhan 430076, China; <sup>g</sup>Department of Biological Sciences, Mississippi  
17 State University, Mississippi State, MS 39762; <sup>h</sup>State Key Laboratory of Plant Genomics,  
18 Institute of Genetics and Developmental Biology, Chinese Academy of Sciences, Beijing  
19 100101, China; <sup>i</sup>Biomedical Pioneering Innovative Center (BIOPIC) and Beijing Advanced  
20 Innovation Center for Genomics (ICG), Beijing 100871, China; <sup>j</sup>Center for Bioinformatics  
21 (CBI) and State Key Laboratory of Protein and Plant Gene Research, Peking University,  
22 Beijing 100871, China; <sup>k</sup>State Key Laboratory of Agricultural Genomics, BGI-Shenzhen,  
23 Shenzhen 518083, China; <sup>l</sup>PASTEUR, Département de chimie, École normale supérieure, PSL  
24 University, Sorbonne Université, CNRS, 24 rue Lhomond, 75005 Paris, France; <sup>m</sup>School of  
25 Physics, Peking University, Beijing 100871, China; and <sup>n</sup>Institute of Botany, Chinese Academy  
26 of Sciences, Beijing 100093, China

27

28 <sup>1</sup>F. L., J.-J. Y., Z.-Y. S. and L. W. contributed equally to this work.

29 <sup>2</sup>To whom correspondence may be addressed. Email: houhw@ihb.ac.cn or  
30 shunongb@pku.edu.cn or liling@biology.msstate.edu.

31

## 32 **AUTHOR CONTRIBUTIONS**

33 F.L., J.-J.Y., Z.-Y.S., and L.W. are joint first authors; S.-N.B., H.-W.H., L.L., D.-M.Z., and Z.-

34 H.X. designed the experiments and managed the project; L.-Y.Q., S.A., W.-F.N., and F.L.

35 contributed to the Plant on chip culturing; S.-J.W., C.-X.L., Y.C., and Q.O. contributed to the

36 plant on chip device design; Y.-Q.L., H.-M.Z., L.-F.D. and D.-H.W. performed Cryo-SEM,

37 microCT and TEM; F.L., J.-J.Y., Z.-Y.S., L.W., and S.O. performed the data analysis and

38 validation; J.-J.Y. and H.-W.H. subcultured Wa7733; Z.-Y.S., L.-Z.J., W.-P.Q., X.-K.L., C.W.,

39 D.-P. W., and L.L. performed genome assembly, annotation, and analyses, and gene family  
40 characterization; J.Y., and F.-C.T. conducted single-plant RNA sequencing; H.-L.Y., and Z.-  
41 K.C. performed chromosome FISH analysis; D.-C.Y., C.-W.X., and G.G. completed  
42 transcription regulatory network analysis and database website construction; Y.W., B.-C.Z., and  
43 Y.-H.Z. completed cell wall composition analysis and phylogenetic analysis; X.G., S.-H.X.,  
44 L.W., L.L., and H.L. conducted single-nucleus RNA sequencing analysis; T.-B.P., and X.-D.S.  
45 performed protein structure prediction and classification; J.-J.Y., and H.-W.H. performed gene  
46 transformation of *W. auatraliana*; L.L., and S.-N.B. wrote and revised the manuscript with  
47 inputs from all authors.

48

49 **Competing interests:** The authors declare no competing interest.

50

51 **Classification:** Biological Sciences/Plant Biology

52

53 **Keywords:** *Wolffia australiana*, High-quality genome, Morphogenesis, Plant-on-Chip

54

55 This PDF file includes:

56 Main Text

57 Figures 1 to 6

58 Table 1

59

60 **Abstract**

61 A plant can be thought of as a colony comprising numerous growth buds, each developing to  
62 its own rhythm. Such lack of synchrony impedes efforts to describe core principles of plant  
63 morphogenesis, dissect the underlying mechanisms, and identify regulators. Here, we use the  
64 tiniest known angiosperm to overcome this challenge and provide an ideal model system for  
65 plant morphogenesis. We present a detailed morphological description of the monocot *Wolffia*

66 *australiana*, as well as high-quality genome information. Further, we developed the Plant-on-  
67 Chip culture system and demonstrate the application of advanced technologies such as snRNA-  
68 seq, protein structure prediction, and gene editing. We provide proof-of-concept examples that  
69 illustrate how *W. australiana* can open a new horizon for deciphering the core regulatory  
70 mechanisms of plant morphogenesis.

71

## 72 **Significance**

73 What is the core morphogenetic process in angiosperms, a plant like a tree indeterminately  
74 growing, or a bud sequentially generating limited types of organs? *Wolffia australiana*, one of  
75 the smallest angiosperms in the world may help to make a distinction. *Wolffia* plantlet  
76 constitutes of only three organs that are indispensable to complete life cycle: one leaf, one  
77 stamen and one gynoecium. Before the growth tip is induced to flower, it keeps branching from  
78 the leaf axil and the branches separate from the main plantlet. Here we present a high-quality  
79 genome of *W. australiana*, detailed morphological description, a Plant-on-Chip cultural  
80 system, and some principle-proof experiments, demonstrating that *W. australiana* is a  
81 promising model system for deciphering core developmental program in angiosperms.

82

## 83 **Introduction**

84 What are the core morphogenetic processes required for a multicellular organism to complete  
85 its life cycle? For most species in the animal kingdom, embryogenesis plays such a core role,  
86 with all organs initiated at that stage. By contrast, in most species in the plant kingdom, organs  
87 and tissues are produced sequentially. Plant development starts, like that of animals, with the  
88 formation of a zygote, whose number and types of organs are limited. However, plants then go  
89 on to produce an indeterminate number of organs such as leaves, roots and stems before they  
90 produce spores and initiate the gametophyte for formation of haploid gametes. Also in contrast

91 to animals, during the process of completing the life cycle, in addition to the growth tip derived  
92 from the zygote, many plants can produce new growth tips in the axillary buds.

93 C. H. Waddington (1) pointed out that each apical meristem “gives rise to a whole new  
94 cycle of growth and development.” Since a plant comprises many branches derived from lateral  
95 growth, each plant may be seen as a colony of buds (or meristems) supporting growth, in  
96 essence rather comparable to the outer shell of a coral colony than to an individual worm, bird,  
97 or cat. Notably, unlike the broad synchronization of polyps inhabiting coral structures in their  
98 developmental process on an annual rhythm, plant branches or buds undergo their development  
99 independently of one another. For example, in the perennial plant alpine rock cress (*Arabis*  
100 *alpina*), a close relative of the model plant Arabidopsis (*Arabidopsis thaliana*), a subset of  
101 meristems will transition to their reproductive stage under conditions conducive to flowering,  
102 while other meristems will remain vegetative (2). Likewise, apple (*Malus domestica*) trees  
103 carry vegetative buds and floral buds in various developmental stages simultaneously to  
104 support vegetative growth and fruit harvest each year.

105 While the morphogenetic strategy combining apical growth and branching rendered  
106 advantages for plants as sessile and photoautotrophic eukaryotes, this morphogenetic strategy  
107 can make it difficult to elucidate the core morphogenetic processes due to a general lack of  
108 synchronization between meristems. We reasoned that truly systematic dissection of the  
109 mechanisms driving the core principles of plant morphogenesis requires a plant species with  
110 simple branching, few organs, and clearly distinguishable morphological boundaries for  
111 empirical investigations. We propose here that the genus *Wolffia* provides such an ideal plant  
112 (Fig. 1).

113 *Wolffia* is a genus of aquatic plants. It is the simplest and smallest known angiosperm in the  
114 world (3, 4). Each *Wolffia australiana* plantlet consists of a single boat-like leaf with a diameter  
115 of 1 mm, with a few axillary buds wrapped around the base of the leaf, but no root. After the

116 axillary buds grow, they separate (abscise) from the main plantlet. Under stress conditions, the  
117 plantlet produces one stamen and one gynoecium, which arise vertically upward from a hole  
118 generated in the center of the “deck” of the boat-like leaf. The stamen consists of two locules  
119 containing numerous pollen grains, while the gynoecium contains a single ovule (5, 6); Fig. 1).  
120 Therefore, the *Wolffia* plantlet harbors a minimal set of core organs needed for an angiosperm  
121 to complete its life cycle, and not much more.

122 What insights might be gleaned using the *Wolffia* plantlet as a model system? Work on the  
123 tiny angiosperm over the past 60 years provides some clues. For instance, the transition from  
124 vegetative branching to floral organs only takes a few days, thus offering a unique opportunity  
125 to decipher the mechanisms of cell fate change along a precise spatiotemporal pattern (7, 8).  
126 *Wolffia* as a model system may thus unlock the developmental programs underlying plant  
127 morphogenesis.

128 The shoot apical meristem (SAM) of *Wolffia* plantlets is also much simpler than that of  
129 other spermatophytes. While the shoot tip is made up of a cell cluster in gymnosperms and  
130 angiosperms, a single cell or a few cells are sufficient to carry out the functions of a growth  
131 tip, as in the haploid moss *Physcomitrium* (*Physcomitrella*) *patens*, or in the diploid  
132 pteridophytes such as *Selaginella* or *Adiantum*. Considering that the entire *Wolffia* plantlet is  
133 only 1 mm in diameter, and based on observations that revealed too few cells at the tip to  
134 organize into a higher-order structures as that seen in angiosperms (6, 9-13), the *Wolffia*  
135 growth tip holds the promise of a much simplified organization with no tunica-carpus structure  
136 that can produce leaves, axillary buds, and finally the stamen and gynoecium.

137 All species in the *Wolffia* genus lack a clear root, while other closely related duckweed  
138 species, such as *Lemna minor*, *Lemna gibba*, and *Spirodela polyrhiza*, all have roots. The  
139 absence of the root is therefore unlikely to represent an adaptation to an aquatic environment.  
140 Using the rich information available on root development in land plants such as *Arabidopsis*,

141 rice (*Oryza sativa*), and maize (*Zea mays*), it should be possible to generate testable  
142 hypotheses to mechanistically explain the absence of roots in *Wolffia* and contribute to our  
143 understanding of the origin(s) and morphogenesis of roots in angiosperms.

144 Perhaps the greatest advantage of *Wolffia* plantlets is that they only carry a single leaf, as  
145 each new branch will bud off as a separate plantlet. This growth pattern thus provides unique  
146 opportunities to continuously observe the same plantlet for its entire life cycle under a  
147 microscope.

148 The simplicity of the *Wolffia* genus and its duckweeds relatives has attracted much interest  
149 and has led to efforts to develop this tiny plant(let) into an experimental system (3-5, 14, 15).  
150 However, key tools are currently lacking to propel the *Wolffia* genus as a model system to  
151 investigate core principles of the plant life cycle. Here, we report our efforts in developing *W.*  
152 *australiana* as a model system. We sequenced the genome of this species, which will  
153 complement other genome sequences from this species recently published (16, 17) and set up  
154 a “Plant-on-Chip (PoC)” culture system with which to observe morphological characteristics,  
155 particularly in the diploid phase. We also exploited the genomic information we generated to  
156 analyze the possible mechanisms behind unique morphological traits seen in *W. australiana*  
157 such as the lack of a root or a vasculature and the fast transition from vegetative to reproductive  
158 growth. Furthermore, we demonstrated the feasibility of obtaining transgenic plantlets, single-  
159 nucleus RNA-sequencing (snRNA-seq) and protein structure prediction. We believe that this  
160 new PoC system will serve as a platform for the dissection of core principles underlying plant  
161 morphogenesis and predict that our PoC system will open new avenues in plant biology  
162 research.

163

## 164 **Results**

165 **Morphological Uniqueness: Growth Tip, Branch, and Floral Organs.** A typical plantlet

166 (previously termed a “frond”) of *W. australiana* has one boat-shaped leaf with a branch  
167 (previously called a daughter frond) on the side (6) (Fig. 1 *A* and *B*). Our detailed observations  
168 (below) revealed that frond is not the correct term for these structures. We therefore refer to  
169 them as plantlets and branches instead of fronds and daughter fronds, respectively, hereafter.

170 Close observations revealed that the deck part of the boat-shaped leaf is relatively dark  
171 green with smaller cells, while the hull part was relatively light green with larger cells (Fig.  
172 *1B*). Using cryo-scanning electron microscopy, we observed stomata on the surface of the deck  
173 but not on the hull surface (Fig. 1 *C* and *D*). We also noticed the presence of a scar near the  
174 hole from where the branched plantlets continuously protrude out (Fig. *1E*), corresponding to  
175 plantlet abscission from the petiole linking the branching plantlet. The hole and scar provided  
176 clear markers to orientate a plantlet. Under inductive conditions (see below), we observed the  
177 emergence of a crack in the center of the deck, perpendicularly to the hole from which  
178 branching plantlets protrude. The floral organs, one stamen and one gynoecium, rose from the  
179 crack (Fig. 1 *F* and *G*; video at [www.wolffiapond.net](http://www.wolffiapond.net), Username and Password: waus).

180 After peeling off the deck, we noticed three consecutive plantlets (on growing branches) of  
181 decreasing size (Fig. *1H*). Such an alignment suggested that the branched plantlets are initiated  
182 sequentially inside the boat-shaped leaf. We confirmed this branch alignment by micro-  
183 computed tomography (CT) (Fig. *1I*). This interpretation was also consistent with the  
184 observation that plantlets continuously protrude (see video at [www.wolffiapond.net](http://www.wolffiapond.net)).

185 Where do branched plantlets arise? Focusing on the smallest primordium next to the inside  
186 surface of the boat-shaped leaf (Fig. 1 *J* and *K*), we observed several cells with a big nucleus  
187 and a condensed cytoplasm, arranged in the innermost region. Such cellular characteristics are  
188 typically associated with meristematic cells, suggesting that these cells may constitute the  
189 growth tip in *W. australiana*. Indeed, the development of the growth tip from branched plantlets  
190 supported this hypothesis: Following its initiation, the leaf primordium underwent asymmetric

191 growth, with the outer portion of the primordium growing faster than the inner region. After  
192 the differentiation of the petiole (Fig. 1J), the fast-growing outer region protruded inward and  
193 overlapped with the slow-growing inner region (Fig. 1 J and L). The space between the two  
194 regions then formed a cavity inside the boat-like leaf, after which point a new growth tip  
195 initiated a new branch at the innermost point of the cavity (Fig. 1L). We thus conclude that the  
196 functional growth tip in *W. australiana* is not a multicellular cluster with a tunica-carpus  
197 structure like that seen in angiosperms, but only comprises one to a few cells that are induced  
198 during primordium differentiation. Such a growth tip organization repeated in each branch  
199 (compare Fig. 1 M and J).

200 While all branched plantlets grew outward, the innermost region next to the inner surface  
201 of the boat-shaped leaf enlarged upon flower induction conditions, visible as two bumps (Fig.  
202 1 N–P). Compared to the specific orientation of floral organs (Fig. 1Q), these two bumps  
203 appeared to be the early stages of the stamen and the gynoecium primordia, respectively.  
204 Although we did not follow fertilization or seed development, we did observe the  
205 differentiation of floral organs (*SI Appendix*, Fig. S1; [www.wolffiapond.net](http://www.wolffiapond.net)).

206

207 **Genome Sequence, Assembly, and Analysis.** To aid in exploring the developmental  
208 innovations of the *Wolffia* genus, we performed whole-genome sequencing with a combination  
209 of strategies, including Nanopore PromethION (ultra-long), Illumina NovaSeq 6000 and Hi-C  
210 reads, and Bionano to construct the reference genome for accession wa7733 (referred here as  
211 Waus). We generated 18.46 Gb of ultra-long reads, 22.85 Gb of Illumina data, 253.08 Gb of  
212 Bionano data, and 36.55 Gb of Hi-C data (Dataset, Table S1). To help with later genome  
213 annotation, we produced 202.46 Gb of data by transcriptome deep sequencing (RNA-seq). To  
214 survey the genome, we used 11.3 Gb of Illumina paired-end reads (out of 22.85 Gb), resulting  
215 in 8.3 Gb of clean reads after quality-control steps and the removal of organellar and bacterial



216 genomes. Based on these paired-end reads, we estimated the genome size to be 353,335,418  
217 bp with a heterozygosity of less than 0.3% (*SI Appendix*, Fig. S2; Dataset, Table S2), which  
218 indicates that the Waus genome is very homozygous.

219 We used Nanopore reads to assemble the *W. australiana* genome into contigs. The G1  
220 (genome version 1) contig length was 358.51 Mb, with an N50 size of 17.96 Mb. The G2 was  
221 362.72 Mb (Dataset, Table S3). We also identified 4,345,907 bp of sequences corresponding to  
222 the mitochondrial and chloroplast genomes or to other contaminants. We distinguished true  
223 genomic sequences from other contaminants based on their GC contents (*SI Appendix*, Fig. S3  
224 *A and B*). The Bionano data were used to correct the G3 genome, and five gaps were produced,  
225 resulting in 26 sequences for G4 (size of 358.77 Mb) that we assembled into 20 pseudo-  
226 chromosomes (Fig. 2 *A–C*; Dataset, Table S4). The mapping rates of RNA-seq against the  
227 genome assembly were 95.1% (Dataset, Table S5). Fluorescence *in situ* hybridization (FISH)  
228 analysis on prometaphase chromosomes confirmed 20 pairs of homologous chromosomes,  
229 representing 40 somatic chromosomes in the *W. australiana* genome (*SI Appendix*, Fig. S4).

230 We also identified homozygous single nucleotide polymorphism (SNP) sites and  
231 insertion/deletion (InDels) by comparing the genome sequence reported here with those from  
232 other *W. australiana* species, yielding 6,764 SNPs and 3,166 InDels with minimal support of  
233 at least five Illumina reads (Dataset, Table S6). The contig N50 of our Waus genome was  
234 18,579,918 bp compared to 251,357 bp for wa7733, 102,226 bp for wa8730, and 742,788 bp  
235 for wa8730 (three other published *W. australiana* genomes) (16, 17). Analysis of  
236 Benchmarking Universal Single-Copy Orthologs (BUSCO) demonstrated that our genome  
237 assembly is much more complete than previously sequenced and assembled *W. australiana*  
238 genomes, with BUSCO scores of 94.55% (Waus), 77.10% (wa7733), 80.29% (wa8730), and  
239 87% (wa8730) (Table 1; Dataset, Table S7).

240

241 **Genome Annotation and Phylogenetic Analysis.** The *W. australiana* genome Waus contained  
242 227.8 Mb (or 63.5% of the genome) of repetitive regions, consisting of both transposable  
243 elements (TEs) and tandem repeats (TRs). TEs with long terminal repeats (LTRs) represented  
244 the majority (41.8%) of TEs, followed by DNA transposons (9.2%), long interspersed nuclear  
245 elements (*LINES*) (3.9%), and miniature inverted-repeat transposable elements (*MITEs*) (1.1%)  
246 (Dataset, Table S8). We predicted 1,658 non-coding RNAs for a total length of 237.2 kb,  
247 including 191 ribosomal RNAs (rRNAs), 867 non-coding RNAs (ncRNAs), eight regulatory  
248 RNAs, and 592 transfer RNAs (tRNAs) (Dataset, Table S9). We also predicted 22,484 protein-  
249 coding genes with an average length per gene of 3,789 bp (Dataset, Table S10 and S11). Finally,  
250 we compared the predicted Waus protein sequences to biological databases, resulting in  
251 functional annotation for 69.5% of all genes. We also obtained support for 75.04% of all  
252 predicted gene models in RNA-seq samples (Dataset, Table S10).

253 We determined the phylogenetic relationship between *W. australiana* and 14 other  
254 Viridiplantae species using a set of low-copy orthologous gene groups (Dataset, Table S11 and  
255 S12). Specifically, the phylogenetic results and fossil calibration time revealed that *W.*  
256 *australiana* 7733 diverged from *W. australiana* 8730 approximately 0.24 million years ago  
257 (mya) (Fig. 2D; Dataset, Table S13). We also compared the Waus genome to the genomes from  
258 other plant species to elucidate key genomic changes associated with adaptation to a small plant  
259 stature. We thus identified the expansion of 196 gene families and the contraction of 3,029 gene  
260 families in the cluster of *W. australiana* relative to plant species with larger body plans (Fig.  
261 2D). For example, the *AGAMOUS-LIKE* (*AGL*) family involved in flowering typically clusters  
262 in 11 groups in flowering plants (Fig. 2E; Dataset, Table S14) but only defined nine groups in  
263 the Waus genome, suggestive of an incomplete *AGL* family in *W. australiana*. Similarly, many  
264 of the root-related small auxin up-regulated RNA (*SAUR*) genes were missing in *W. australiana*  
265 (Fig. 2F; Dataset, Table S14).

266

267 **Millifluidic Setup for Tracking Plantlets.** To track the developmental processes of individual  
268 plantlets as they physically separate from one another, we designed a millifluidic chip system  
269 for plantlet culture. The chip design is quite simple: We poured polydimethylsiloxane (PDMS)  
270 (using Momentive clear RTV615 potting and encapsulating compound in a 10:1 ratio) into  
271 molds to create 1-mm-wide channels (Fig. 3A). Each chip can hold over 100 plantlets and is  
272 sufficient to carry out most experiments.

273 To circulate the culture medium, we connected a peristaltic pump to the chip to help the  
274 liquid medium (half-strength Murashige and Skoog [MS]) flowing (Fig. 3B). Starting from a  
275 single plantlet with its first branch budding out along the long axis, the plantlets will line up  
276 along the channel (Fig. 3C). As the newly released (abscised) plantlet will also bud out of its  
277 own branch in the opposite orientation, the plantlets will align in a predictable order along the  
278 channel, as depicted in Fig. 3D. We designated the chip system “Plant-on-Chip” (or PoC).

279 For the convenience of tracking morphogenesis and manipulating the growth conditions,  
280 we also designed a customized incubator controlled by a computer and connected to a digital  
281 camera (*SI Appendix*, Fig. S5). All culture parameters can be programmed; plantlet growth can  
282 be monitored in an automated fashion. A typical growth curve under normal growth conditions  
283 (26°C, short-day photoperiod of 8 h light/16 h dark with 26.99  $\mu\text{mol photons/m}^2/\text{s}$ ) is shown  
284 in Fig. 3E. Under normal conditions, each plantlet can release a new plantlet about every 48 h  
285 ( $\pm 12$  h) and survive for about a month thereafter. We tested several flowering inductive  
286 conditions previously reported to induce flowering in *W. microscopia* (7, 8, 18) and  
287 successfully defined conditions that will induce flowering in *W. australiana* growing within  
288 the PoC (*SI Appendix*, Fig. S6). We can therefore collect samples for morphological analyses  
289 (see above) and for the analysis of gene expression during flower development (see below).

290

291 **Genomic and Expression Characteristics Underlying Unique *W. australiana***  
292 **Morphological Traits.** *The Rootless Phenotype of *W. australiana* Cannot Be Explained by*  
293 *Gene Loss.* A prominent morphological trait of *W. australiana* is its lack of roots. An attractive  
294 explanation would be that genes required for root development have been lost. However, we  
295 identified homologs for all known Arabidopsis genes involved in root development in the Waus  
296 genome (Dataset, Table S14). The formation of an auxin gradient is crucial for root initiation  
297 and maintenance of all root types (19, 20). However, in the region near the growth tip of *W.*  
298 *australiana*, cellular alignment required for an auxin gradient is hard to see (Fig. 1). This might  
299 result in the observed rootless phenotype.

300

301 *Loss of NACs that Specify Vascular Differentiation may Explain the Lack of a Vasculature.* We  
302 observed no vascular tissue in *W. australiana*, in contrast to its close relative, duckweed  
303 *Spirodela polyrhiza* (Fig. 4A). However, the cell wall composition of *W. australiana* is similar  
304 to that of aquatic plants harboring vascular bundles (21) (Fig. 4B). As xylem vessels usually  
305 possess thickened cell walls with specific patterns, referred to as the secondary cell wall  
306 (SCW), we looked for genes that are known to be involved in SCW formation in the Waus  
307 genome. We detected most SCW genes, indicating that cell wall biogenesis is likely intact in  
308 *W. australiana* (Dataset, Table S15). However, in contrast to the 13 Arabidopsis and nine rice  
309 SCW-related *NAM-ATAF1,2-CUC2* (NAC) gene family members (Dataset, Table S15 and S16),  
310 which encode the upstream master regulators for SCW formation in vascular plants (22), we  
311 only identified one homolog in *W. australiana*. This gene, WausLG14.977, clustered separately  
312 from the groups defined by Arabidopsis VASCULAR-RELATED NAC DOMAIN PROTEIN6  
313 (VND6, At5g62380) and VND7 (At1g71930) (Fig. 4C), two master NACs involved in xylem  
314 vessel differentiation (22).

315 To test the function of WausLG14.977, we transiently expressed the gene in *Nicotiana*

316 *benthamiana* leaves. Based on the UV excited fluorescent signals that derived from lignified  
317 SCW, we observed spiral SCW bands in the epidermal cells expressing WausLG14.977 but not  
318 in cells transiently infiltrated with the empty vector (Fig. 4D). The formation of vessel-like  
319 cells thus suggested that WausLG14.977 has the potential to be a functional VND-like  
320 regulator. This interpretation was further corroborated by the similarity in protein structure  
321 between the protein encoded by WausLG14.977 and Arabidopsis SECONDARY WALL-  
322 ASSOCIATED NAC DOMAIN PROTEIN1 (SND1, At1g32770), as predicted by  
323 RoseTTAFold (*SI Appendix*, Fig. S7).

324 Taken together, while the single *NAC* family member WausLG14.977 appeared to be  
325 functional for SCW formation, loss of homologs from the VND6 and VND7 clades and/or the  
326 lack of downstream components essential for xylem vessel development may be responsible  
327 for the absence of vascular tissues in *W. australiana*.

328

329 *Correlation between Differential Gene Expression and Flower Development.* Similar to *W.*  
330 *microscopia*, the transition from vegetative growth to induced flower morphogenesis is very  
331 fast and can take place in as few as 5 days in *W. australiana*, although not at a high frequency  
332 (*SI Appendix*, Fig. S6). This quick transition and the simple reproductive structures (Fig. 1),  
333 combined with the PoC system to track the transition process of a single plantlet, prompted us  
334 to explore the underlying regulatory mechanism. Accordingly, we collected three groups of  
335 individual plantlets for single plantlet RNA-seq: 1) plantlets with floral organs 5 days after  
336 application of EDTA treatment (to induce flowering), defined as F (flowered) samples; 2)  
337 plantlets with no floral organs under the same inductive conditions (plantlet responses to  
338 flowering induction were not synchronized), defined as I (induced) samples; and 3) plantlets  
339 grown for the same duration but not exposed to EDTA treatment, defined as C (control) samples  
340 (Fig. 5A). Using a candidate gene list of about 500 Arabidopsis and 100 rice flowering genes

341 as queries, we identified about 200 homologous genes in *W. australiana* (Dataset, Table S14  
342 and S16). Some of these genes exhibited differential expression between the C, I, and F groups,  
343 either upregulated (Fig. 5B; Dataset, Table S17) or downregulated (Fig. 5C; Dataset, Table  
344 S17). Among differentially expressed genes, we noticed that WausLG03.251 (homolog of  
345 *FLOWERING LOCUS T* [*FT*]) and WausLG11.346 (homolog of *FLOWERING PROMOTING*  
346 *FACTOR1* [*FPF1*]) are highly expressed in F samples (Dataset, Table S14 and S18), which was  
347 in agreement with the expression patterns of their Arabidopsis and rice homologs during the  
348 induction of flowering.

349 As an aquatic plant, the living conditions for *W. australiana* should be more stable than  
350 those of land plants because of the buffering capacity provided by water. Among the contracted  
351 gene families, we determined that miR156 is missing in *W. australiana* (Dataset, Table S14).  
352 Although its target transcripts from *SQUAMOSA PROMOTER-BINDING-LIKE PROTEIN3*  
353 (*SPL3*) or the other family members *SPL4*, *SPL5*, *SPL9*, and *SPL15* were present in the *W.*  
354 *australiana* genome, the loss of miR156, as well as miR172 (Dataset, Table S14), may explain  
355 the seemingly abrupt shift from vegetative growth to floral organ differentiation brought upon  
356 by the absence of the phase change observed in Arabidopsis and other plants normally mediated  
357 by the miR156-SPL module (23, 24).

358 Despite the loss of sepals and petals in the *W. australiana* flower, all MADS-box genes  
359 were present in the *W. australiana* genome and appeared to be expressed (Dataset, Table S14).  
360 This observation thus raises a question about the genomic maintenance of MADS genes  
361 participating in sepal and petal identity determination in an organism lacking these organs over  
362 the course of evolution.

363 We also carried out a transcription regulatory network (TRN) analysis (25) with single-  
364 plantlet RNA-seq data to decipher the regulatory mechanisms behind floral organ initiation and  
365 differentiation. While the overall topological structures of TRNs between C-I and C-F pairs

366 were quite similar, several network nodes distinguished the two TRNs (circled in Fig. 5 D and  
367 E). While none of these distinct node genes were curated explicitly as known “flowering genes”  
368 (Dataset, Table S19), the node genes exhibiting the most prominent differences ( $P = 1.65e^{-8}$ ,  
369 odds ratio = 60.90, hypergeometric distribution test) between the two treatments were those  
370 annotated as encoding APETALA2 (AP2)/ETHYLENE RESPONSE FACTOR (ERF) and TCP  
371 (TEOSINE BRANCHED1 [TB1], CYCLOIDEA [CYC], (PROLIFERATING CELL  
372 NUCLEAR ANTIGEN FACTOR1 [PCF1]) members (Fig. 5 D and E; Dataset, Table S19; note:  
373 although WausLG06.531 and WausLG08.783 are circled, they do not belong to the TCP  
374 family). TCPs were reported to be involved in floral organ formation (26). However, we  
375 determined that none of the *TCP* genes are differentially expressed in the C-F TRN, as expected  
376 based on the proposed function of Arabidopsis *TCPs*, although they were differentially  
377 expressed in the C-I TRN, that is from samples induced to flower but lacking clear floral organs  
378 (Fig. 5 D and E). As AP2/ERF members have a wide range of functions in plants (26), the  
379 different TRN patterns for these two node genes raise interesting questions as to whether and  
380 how these genes function in *W. australiana* floral organ induction and differentiation.

381

382 **Single-nucleus RNA-seq, Protein Structure Predictions, and Gene Transformation.** A  
383 valuable model system should have a high-quality sequenced genome and should be amenable  
384 to genetic manipulation for the dissection of gene function. Here, we applied single-nucleus  
385 RNA-seq (snRNA-seq) and other techniques with *W. australiana*.

386 In a pilot experiment, we collected 2 g of plantlets cultured in flasks under regular growth  
387 conditions for nuclear isolation (27), followed by snRNA-seq (28). After data processing and  
388 quality control, we retained 15,983 nuclei and 14,812 genes for clustering, cell type annotation,  
389 and other analyses. Fig. 6 illustrates the clustering pattern obtained by Uniform Manifold  
390 Approximation and Projection (UMAP); Dataset, Table S20 provides the cell type annotation



391 of each cluster. We were surprised to identify almost all cell types (Dataset, Table S20; for full  
392 information see Dataset, Table S21), although the collected samples only consisted of boat-  
393 shaped leaves (with guard cells) and growth tips (Fig. 1). Notably, the results presented here  
394 are similar to those observed in snRNA-seq of freshwater sponge (*Spongilla lacustris*) (29).  
395 We will discuss this interesting phenomenon later.

396 We also tested the usefulness of the protein prediction software AlphaFold2 (30, 31),  
397 considering the importance of protein structures in biological structures and processes.  
398 Accordingly, based on our high-quality genome sequence and RNA-seq data, we selected 6,800  
399 predicted non-homologous protein sequences encoded by the *W. australiana* genome using  
400 MMseqs2 (32). With the non-docker version of AlphaFold2, we predicted 6,798 structures and  
401 related information ([www.wolffiapond.net](http://www.wolffiapond.net)). Only two predicted proteins failed to generate a  
402 structure due to video memory limitations. While the true protein structures remain to be  
403 experimentally examined, the high efficiency of protein structure prediction with AlphaFold2  
404 to the *W. australiana* coding sequences was very encouraging.

405 Effective genetic transformation is an indispensable tool to manipulate the genome during  
406 functional investigations. In duckweed research, transgenic procedures have been reported in  
407 species other than *W. australiana* (14). We previously developed transgenic procedures for the  
408 stable transformation of *Wolffia globosa* and *S. polyrhiza* (L.) (33, 34). Here, we identified a  
409 set of modifications to the procedure to generate transgenic *W. australiana* plants (*SI Appendix*,  
410 Fig. S8).

411 The PoC system is available for research teams interested in investigating fundamental  
412 questions in plant biology and plant development.

413

## 414 **Discussion**

415 Here, we report that using *W. australiana* as a model system enables some fundamental issues



416 in plant morphogenesis to be analyzed.

417

418 **Uncoupling the Form and Function of the Growth Tip in Angiosperms.** The growth tips of  
419 most angiosperms exhibit a tunica-carpus structure, while those of gymnosperms,  
420 pteridophytes, and bryophytes do not. Since the growth tips nevertheless carry out their  
421 functions as the centers of morphogenesis, the functional relevance of the tunica-carpus  
422 structure in angiosperms and how multicellular growth tips emerged remain elusive. Based on  
423 our observations in *W. australiana*, it is clear that the cell(s) located in the innermost regions  
424 of the cave behave as a growth tip, although they are not organized into a tunica-carpus  
425 structure (Fig. 1K). Under non-inductive conditions, the growth tip continuously generates leaf  
426 primordia (Fig. 1; *SI Appendix*, Fig. S2). Under inductive conditions, the growth tip enlarges  
427 and protrudes further inward before forming one stamen and one gynoecium (Fig. 1 *N-Q*).  
428 Based on these observations, we conclude that the tunica-carpus structure is dispensable for  
429 the proper function of the angiosperm growth tip, at least in the case of *W. australiana*.

430 The uncoupling of the form and function of the growth tip in angiosperms is not exclusive  
431 to *W. australiana*. Indeed, mutants in the Arabidopsis gene *WUSCHEL* (*WUS*) retain the ability  
432 to produce lateral organs from their growth tip for flowering, although the mutant lacks a  
433 typical tunica-carpus structure (35). One outstanding question worth pursuing is to investigate  
434 when and how the tunica-carpus structure evolved at the growth tip of angiosperms.

435 The emergence of axillary meristems has been explained by two rival hypotheses: *de novo*,  
436 the meristematic cells arise from differentiated somatic cells; and detached, the meristematic  
437 cells derives from preexisting meristematic cells (36). In agreement with a previous report (37),  
438 our observations on growth tip emergence during the differentiation of leaf primordia (Fig. 1 *I*,  
439 *J*, *L* and *M*) support the *de novo* hypothesis. In addition, compared to the *in vitro* regeneration  
440 of a shoot apical meristem in tissue culture conditions (38), the relatively stable pattern of

441 growth tip emergence in *W. australiana* makes it as an ideal experimental system to precisely  
442 investigate the spatiotemporal mechanism of the transition from partially differentiated somatic  
443 cells to meristematic cells.

444

445 **A Unique Opportunity for Detailed Analyses of the Causal Relationship between Genome**  
446 **Rewiring and Morphogenetic Simplification.** The genome of *W. australiana* did not exhibit  
447 a dramatic size reduction relative to its close relatives *Colocasia esculenta* and *Zostera marina*,  
448 which produce multiple organ types in contrast to *W. australiana* (Fig. 2). Based on the  
449 genomic analyses presented here, we offer several clues that might explain this morphogenetic  
450 simplification: First, the *W. australiana* genome might have experienced a dramatic structural  
451 rewiring, as we detected 378 expanded gene families and 1,844 contracted gene families based  
452 on gene copy number, relative to its closest relatives (Fig. 2). Second, specific gene families  
453 showed a contraction in their constituent members. Members from the *AGL* family cluster into  
454 11 groups in most plant species, whereas the *W. australiana* genome encoded *AGL* homologs  
455 belonging to nine groups (Fig. 2E). Similarly, the 13 Arabidopsis SCW-related *NAC* genes had  
456 a single homologous gene in *W. australiana*, which might be responsible for the non-vascular  
457 phenotype of this tiny plant (Fig. 4, Dataset, Table S15). Based on recent findings of the  
458 dynamic features of chromatin structures, it is reasonable to hypothesize that the relative stable  
459 aquatic conditions experienced by *W. australiana* may have contributed to genome rewiring,  
460 including gene and/or gene family contraction.

461 Other regulatory mechanisms may have also participated in the morphogenetic  
462 simplification of *W. australiana*. For example, the simple absence of a gene or gene family  
463 cannot explain all cases of morphological innovations, as we identified almost all known genes  
464 required for Arabidopsis root development in the *W. australiana* genome (Dataset, Table S14).  
465 More curiously, our pilot snRNA-seq experiment revealed the expression of genes that are

466 typically markers for tissues or organs missing in *W. australiana* plantlets. Notably, the genome  
467 of freshwater sponges was recently shown to harbor genes involved in nerve cell development,  
468 although this organism lacks this cell type (29). It is possible that the expression of certain  
469 genes may occur prior to the emergence of a given morphogenetic event. Before the genes were  
470 coopted for specific morphogenetic events, they may have carried out other functions. Our  
471 high-quality genome opens the door to exploring the relationships between gene annotation  
472 and morphogenetic events.

473

474 **Retracing Cell Fate Transition from Vegetative to Reproductive Growth in an Individual**  
475 **Growth Tip.** Flowering is one of the morphogenetic processes in angiosperms that has  
476 attracted the most interest in plant research. While significant progress has been made over the  
477 past century, a thorough dissection of the underlying regulatory mechanisms has been hindered  
478 by two limitations: 1) the transition from vegetative to reproductive growth is a long process  
479 consisting of sequential changes from photosynthetic leaves to peripheral organs, with the  
480 added interference of complex branching in an asynchronous system; and 2) the transition from  
481 vegetative to reproductive growth integrates multiple internal and external environmental  
482 changes within each growth tip, which may respond quantitatively and qualitatively differently  
483 (2). A simpler experimental system would be especially helpful here.

484 With the PoC system described here, we easily traced the entire transition from vegetative  
485 to reproductive fate of an individual growth tip. Furthermore, we were able to trace how the  
486 growth tip differentiates into two primordia upon flowering induction (Fig. 1 *N-P*), which will  
487 further differentiate into the stamen and gynoecium, all within a time frame of a few days (Fig.  
488 1 *Q, F* and *G*). In addition, we identified simple but efficient inductive conditions to trigger the  
489 transition. Therefore, with the assistance of cutting-edge single-cell techniques, this PoC  
490 system should provide a unique opportunity to decipher the regulatory mechanisms that drive

491 fate transition with a much lower signal-to-noise ratio.

492 The simplicity of the *W. australiana* floral structure and accessibility may offer a novel  
493 approach to answering Darwin's abominable mystery: the origin of the flower. Based on our  
494 observations (Fig. 1 *N-Q*), the stamen and gynoecium are aligned at the ends of separated  
495 branches. If the stamen and gynoecium in *W. australiana* are considered as elaborated  
496 heterosporangia (39, 40), the origin of the flower may be seen as a result of two separate  
497 evolutionary innovations: the transition from homosporangium to heterosporangia and the  
498 combination of individually initiated fertile telomes, each with micro- and mega-sporangium,  
499 together as a morphological unit recognized as a "flower." *W. australiana* may thus be  
500 amenable to the exploration of how the two primordia emerge upon induction and how they  
501 differentiate into a stamen or gynoecium. Such dissection should provide a substantial basis for  
502 the investigation of heterosporangia differentiation in more species from Pteridophytes to  
503 Spermatophytes.

504 Although we have yet to explore fertilization and seed formation in the *W. australiana* life  
505 cycle, we did precisely visualize and trace most of the morphogenetic events required for  
506 sporophyte development at the cellular level. We have illustrated the possible causal  
507 relationship between morphological traits and genome variation for root and vascular  
508 differentiation. Other interesting morphogenetic events will be open to investigation, such as  
509 the programmed cell death that results in the formation of the crack on the "deck" of the boat-  
510 like plantlets; how guard cells differentiate on the "deck" but not on the "hull"; and how the  
511 asymmetric growth of the leaf primordium is guided. The PoC system established here can  
512 offer a unique opportunity for deciphering the regulatory mechanisms of core processes of plant  
513 development and other interesting morphogenetic events during the sporophyte stage.

514

515 **Materials and Methods**

516 **Biological materials**

517 *Wolffia australiana* wa7733 was from Prof. Hongwei Hou Lab at the National Aquatic  
518 Biological Resource Center, Institute of Hydrobiology, Chinese Academy of Sciences. *W.*  
519 *australiana* plants used for genome sequencing and transcriptome sequencing were cultured in  
520 half MS (Solarbio) solid medium (1% sucrose, pH 5.5) under long-day (LD: 16-h light/8-h  
521 dark) conditions at 26 °C. The fresh plants cultured for 10-15 days were used for the extraction  
522 of genomic DNA for genome sequencing and total RNA for transcriptome sequencing from  
523 plants in a population under cultured conditions (Dataset, Table S1).

524 The *Wolffia* plants were grown in liquid half MS medium (1% sucrose, pH 7 and antibiotics  
525 free), under short-day (SD: 8-h light/16-h dark) conditions at 26 °C on the plates for 1-2 weeks.  
526 Plants were transferred to half MS medium (Control, C) or half MS + EDTA (Sigma) medium  
527 (Induced but not flowered, I and Flowered, F) in chip for 5 days before RNA extraction for  
528 single-plant RNA-seq. Each group (C, I, F) included four single *Wolffia* plants as four  
529 biological replicates.

530 The *Wolffia* plants were grown in half MS medium, under short day at 26 °C on the plates.  
531 The fresh weight of *Wolffia* was 2 g for one sequencing for single-nucleus RNA-seq.

532

533 **Additional Methods.** Floral organ staining, Photomicrograph conditions, Plant-on-chip device  
534 design, Cryo Scanning Electron Microscopy (Cryo-SEM), Sample preparation for Micro  
535 Computed Tomography (microCT) and Transmission Electron Microscopy (TEM), Genome  
536 sequencing, Genome size estimation, Chromosome-level genome assembly and assessment,  
537 Genome repeat and gene annotation, Genome phylogenetic analysis, RNA extraction and  
538 library preparation for single-plant RNA sequencing, Analysis of genes related to  
539 morphological processes, Differential expression genes (DEGs) analysis, Chromosome FISH  
540 analysis, Microscopy, Cell wall composition analysis, Phylogenetic analysis, Transcription

541 regulatory network (TRN) analysis, Protein structure prediction and classification, Single  
542 nucleus isolation, single-nucleus library construction and sequencing, raw data processing, and  
543 generation of gene expression matrix, Cell clustering, cell type identification, quality control  
544 and cell type annotation for snRNA-seq, Gene transformation of *W. auatraliana*, and Statistical  
545 Analysis are in *SI Appendix*, SI Materials and Methods.

546

547 **Data availability.** The genome sequence of *Wolffia australiana* wa7733 has been deposited at  
548 NCBI Genome under the accession CP092600-CP092619 for 20 chromosomes. Raw genome  
549 and transcriptome sequencing reads have been deposited into the NCBI sequence read archive  
550 (SRA) under the BioProject PRJNA808652 (for Nanopore), PRJNA808655 (for Illumina  
551 genome), PRJNA808685 (for Hi-C), PRJNA808734 (for BioNano), PRJNA808736 (for RNA-  
552 seq for genome), PRJNA808739 (for single-plant RNA-seq), and PRJNA809022 (for single-  
553 nucleus RNA-seq). BioNano data have also been deposited into NCBI Supplementary Files  
554 under the accession SUPPF\_0000004267. Genome sequence, single-plant and single-nucleus  
555 RNA-seq are also available at the *Wolffia australiana* wa7733 genome database:  
556 <http://wolffiapond.net>.

557

558 **ACKNOWLEDGMENTS.** We are grateful to Hai-Qi Meng, Mei-Qin Chen in the Bai lab at  
559 Peking University (PKU) for pilot experiments with *Wolffia globosa*; Professor T. Oyama at  
560 Department of Botany Kyoto University for providing *W. australiana* 7733; Yi-Zhen Jia, Xiao-  
561 Fan Zheng, Yue-Yi Che and others in Dr. Feng Li's Lab at High School Affiliated to Renmin  
562 University (HSARU) for their participation in establishing the PoC system and pilot  
563 morphological analysis; Xing Zhang of HSARU for designing the cover; Kai-Le Wang for  
564 manufacturing the incubator; Shu-Qiang Chen and Hui Zhang from BGI-Shenzhen for help  
565 with snRNA-seq data; Prof. Wen-Qin Wang of Shanghai Jiaotong University for providing

566 information about duckweed genome studies; Prof. Yue-Hui He of the School of Advanced  
567 Agriculture, PKU, Prof. Yun-Yuan Xu and Jing-Yu Zhang of the Institute of Botany, Chinese  
568 Academy of Sciences, Prof. Tong-Da Xu of Fujian Agriculture and Forest University, Prof.  
569 Hong-Chang Cui of Florida University for the Arabidopsis gene lists involved in flowering,  
570 auxin and root development. We thank the Facilities Cores at National Center for Protein  
571 Sciences and the TEM platforms at the College of Life Sciences of Peking University for cryo-  
572 SEM, TEM and micro-CT. We also thank Jianlin Chen at the College of Engineering of Peking  
573 University for cryo-SEM, TEM and micro-CT. This work was crowd-funded by all the authors.  
574 This work was supported by Mississippi State University (to L.L.), the International  
575 Partnership Program of Chinese Academy of Sciences (152342KYSB20200021) (to H.-W.H.),  
576 the National Natural Science Foundation of China (32001107) (to J.-J.Y.), and the National  
577 Natural Science Foundation of China (10721403) (to Q.O.).

578

## 579 **References**

- 580 1. C. H. Waddington, Principles of development and differentiation. The Macmillan  
581 Company, New York. (1966).
- 582 2. R. Wang *et al.*, PEP1 regulates perennial flowering in *Arabis alpina*. *Nature* **459**, 423-  
583 427 (2009).
- 584 3. E. Landolt, Physiologische und ökologische Untersuchungen an Lemnaceen. *Ber.*  
585 *Schweiz. Bot. Ges.* **67**, 271-410. (1957).
- 586 4. W. S. Hillman, The Lemnaceae, or Duckweeds: A review of the descriptive and  
587 experimental literature. *Bot. Rev.* **27**, 221-287 (1961).
- 588 5. E. Landolt, R. Kandeler, The family Lemnaceae—monographic study. Zürich:  
589 Geobotanische Institut ETH, Stiftung Rübel. (1986).
- 590 6. F. A. Bernard, J. M. Bernard, P. Denny, Flower structure, anatomy and life history of  
591 *Wolffia australiana* (Benth.) den Hartog & van der Plas. *J. Torrey Bot.* **117**, 18-26  
592 (1990).
- 593 7. S. C. Maheshwari, O. S. Chauhan, In vitro control of flowering in *Wolffia microscopica*.  
594 *Nature* **198**, 99–100 (1963).
- 595 8. J. P. Khurana, S. C. Maheshwari, Floral induction in *Wolffia microscopica* by salicylic  
596 acid and related compounds under non-inductive long days. *Plant Cell Physiol.* **24**,  
597 907–912 (1983).
- 598 9. J. L. Anderson, W. W. Thomson, J. A. Swader, Fine structure of *Wolffia arrhiza*. *Can.*  
599 *J. Bot.* **51**, 1619–1622 (1973).
- 600 10. E. Landolt, *Anatomy of the Lemnaceae (duckweeds)*. Gebrüder Borntraeger, Berlin.  
601 (1998).
- 602 11. G. D. Lemon, U. Posluszny, Shoot development and evolution in *Pistia stratiotes*



- 603 (Araceae). *Int. J. Plant Sci.* **161**, 721-732 (2000).
- 604 12. H. Meng. Control the life cycle of *Wolffia globosa* by microfluidic in Lab. Master's  
605 dissertation. Peking University, Beijing. (2010).
- 606 13. Q. Huang, A comprehensive study on *Wolffia globosa*. Doctoral dissertation. Institute  
607 of Botany, Chinese Academy of Sciences, Beijing. (2007).
- 608 14. K. Acosta *et al.*, Return of the Lemnaceae: duckweed as a model plant system in the  
609 genomics and postgenomics era. *The Plant cell* **33**, 3207-3234 (2021).
- 610 15. E. Lam, T. P. Michael, *Wolffia*, a minimalist plant and synthetic biology chassis. *Trends*  
611 *Plant Sci.* S1360-1385 (2021).
- 612 16. T. P. Michael *et al.*, Genome and time-of-day transcriptome of *Wolffia australiana* link  
613 morphological minimization with gene loss and less growth control. *Genome Res.* **31**,  
614 225–238 (2020).
- 615 17. H. Park *et al.*, Genome of the world's smallest flowering plant, *Wolffia australiana*,  
616 helps explain its specialized physiology and unique morphology. *Commun Biol.* **4**, 900  
617 (2021).
- 618 18. P. N. Seth, R. Venkataraman, S. C. Maheshwari, Studies on the growth and flowering  
619 of a short-day plant, *Wolffia microscopica*: II. Role of metal ions and chelates. *Planta*  
620 **90**, 349-359 (1970).
- 621 19. H. Motte, S. Vanneste, T. Beeckman, Molecular and environmental regulation of root  
622 development. *Annu. Rev. Plant Biol.* **70**, 465-488 (2019).
- 623 20. B. Guillotin, K. D. Birnbaum, Just passing through: The auxin gradient of the root  
624 meristem. *Curr. Top Dev. Biol.* **137**, 433-454 (2020).
- 625 21. F. G. Avcı, B. S. Akbulut, E. Ozkirimli, Membrane active peptides and their biophysical  
626 characterization. *Biomolecules* **8**, 77 (2018).
- 627 22. R. Zhong, C. Lee, J. Zhou, R. L. McCarthy, Z. H. Ye, A battery of transcription factors  
628 involved in the regulation of secondary cell wall biosynthesis in *Arabidopsis*. *The Plant*  
629 *cell* **20**, 2763-2782 (2008).
- 630 23. R. S. Poethig, Vegetative phase change and shoot maturation in plants. *Curr. Top Dev.*  
631 *Biol.* **105**, 125-152 (2013).
- 632 24. C. Zheng, M. Ye, M. Sang, R. Wu, A regulatory network for miR156-SPL module in  
633 *Arabidopsis thaliana*. *Int. J. Mol. Sci.* **20** (2019).
- 634 25. J. Jin *et al.*, PlantTFDB 4.0: toward a central hub for transcription factors and regulatory  
635 interactions in plants. *Nucleic Acids Res.* **45**, D1040-D1045 (2017).
- 636 26. D. H. Gonzalez, *Plant transcription factors evolutionary, structural and functional*  
637 *aspects. Elsevier, Netherlands.* (2016).
- 638 27. A. Farmer, S. Thibivilliers, K. H. Ryu, J. Schiefelbein, M. Libault, The impact of  
639 chromatin remodeling on gene expression at the single cell level in *Arabidopsis*  
640 *thaliana*. *BioRxiv preprint* 10.1101/2020.07.27.223156 (2020).
- 641 28. C. Liu *et al.*, A portable and cost-effective microfluidic system for massively parallel  
642 single cell transcriptome profiling. *BioRxiv preprint.* 10.1101/818450 (2019).
- 643 29. J. M. Musser *et al.*, Profiling cellular diversity in sponges informs animal cell type and  
644 nervous system evolution. *Science* **374**, 717-723 (2021).
- 645 30. J. Jumper *et al.*, Highly accurate protein structure prediction with AlphaFold. *Nature*  
646 **596**, 583-589 (2021).
- 647 31. M. Varadi *et al.*, AlphaFold Protein Structure Database: massively expanding the  
648 structural coverage of protein-sequence space with high-accuracy models. *Nucleic*  
649 *Acids Res.* **50**, D439–444 (2021).
- 650 32. M. Steinegger, J. Soding, MMseqs2 enables sensitive protein sequence searching for  
651 the analysis of massive data sets. *Nat Biotechnol.* **35**, 1026-1028 (2017).
- 652 33. P. P. M. Heenatigala *et al.*, Development of efficient protocols for stable and transient



- 653 gene transformation for *Wolffia globosa* using agrobacterium. *Front. Chem.* **6**, 227  
654 (2018).
- 655 34. J. J. Yang *et al.*, A protocol for efficient callus induction and stable transformation of  
656 *Spirodela polyrhiza* (L.) Schleiden using *Agrobacterium tumefaciens*. *Aquatic Botany*  
657 **151**, 80-86 (2018).
- 658 35. K. Endrizzi, B. Moussian, A. Haecker, J. Z. Levin, T. Laux, The SHOOT  
659 MERISTEMLESS gene is required for maintenance of undifferentiated cells in  
660 *Arabidopsis* shoot and floral meristems and acts at a different regulatory level than the  
661 meristem genes WUSCHEL and ZWILLE. *Plant J.* **10**, 967-979 (1996).
- 662 36. T. A. Steeves, I. M. Sussex, Patterns in plant development (2nd ed.). Cambridge  
663 University Press, Cambridge. (1989).
- 664 37. M. Ikeuchi *et al.*, PRC2 represses dedifferentiation of mature somatic cells in  
665 *Arabidopsis*. *Nat. Plants* **1**, 15089 (2015).
- 666 38. Y. H. Su *et al.*, Auxin-induced WUS expression is essential for embryonic stem cell  
667 renewal during somatic embryogenesis in *Arabidopsis*. *Plant J.* **59**, 448-460 (2009).
- 668 39. W. Zimmermann, Main results of the telome theory. *Palaeobotanist* **1**, 456-470 (1952).
- 669 40. E. M. Gifford, A. Foster, *Morphology and evolution of vascular plants*. W.H. Freeman,  
670 New York. (1989).
- 671 41. J. N. Burton *et al.*, Chromosome-scale scaffolding of de novo genome assemblies based  
672 on chromatin interactions. *Nat Biotechnol.* **31**, 1119-1125 (2013).
- 673 42. Y. Han, S. R. Wessler, MITE-Hunter: a program for discovering miniature inverted-  
674 repeat transposable elements from genomic sequences. *Nucleic Acids Res.* **38**, e199  
675 (2010).
- 676 43. J. Keilwagen, F. Hartung, J. Grau, GeMoMa: Homology-Based Gene Prediction  
677 Utilizing Intron Position Conservation and RNA-seq Data. *Methods Mol. Biol.* **1962**,  
678 161-177 (2019).
- 679 44. M. Ashburner *et al.*, Gene ontology: tool for the unification of biology. The Gene  
680 Ontology Consortium. *Nat. Genet.* **25**, 25-29 (2000).
- 681 45. G. Yu, L. G. Wang, Y. Han, Q. Y. He, ClusterProfiler: an R package for comparing  
682 biological themes among gene clusters. *OMICS* **16**, 284-287 (2012).
- 683 46. M. I. Love, W. Huber, S. Anders, Moderated estimation of fold change and dispersion  
684 for RNA-seq data with DESeq2. *Genome Biol.* **15**, 550 (2014).
- 685 47. Z. Cheng *et al.*, Development and applications of a complete set of rice telotrisomics.  
686 *Genetics* **157**, 361-368 (2001).
- 687 48. Z. Cheng, Analyzing meiotic chromosomes in rice. *Methods Mol. Biol.* **990**, 125-134  
688 (2013).
- 689 49. B. Zhang, Y. Zhou, Carbohydrate Composition Analysis in Xylem. *Methods Mol. Biol.*  
690 **1544**, 213-222 (2017).
- 691 50. K. Tamura, G. Stecher, D. Peterson, A. Filipowski, S. Kumar, MEGA6: Molecular  
692 Evolutionary Genetics Analysis version 6.0. *Mol. Biol. Evol.* **30**, 2725-2729 (2013).
- 693 51. M. Baek *et al.*, Accurate prediction of protein structures and interactions using a three-  
694 track neural network. *Science* **373**, 871-876 (2021).
- 695 52. H. Berman, K. Henrick, H. Nakamura, Announcing the worldwide Protein Data Bank.  
696 *Nat. Struct. Biol.* **10**, 980 (2003).
- 697 53. H. M. Berman *et al.*, The Protein Data Bank. *Nucleic Acids Res.* **28**, 235-242 (2000).
- 698 54. L. Holm, "Using Dali for Protein Structure Comparison". *In Structural Bioinformatics*  
699 **2112**, 29-42 (2020).
- 700 55. J. M. Chandonia, N. K. Fox, S. E. Brenner, SCOPe: classification of large  
701 macromolecular structures in the structural classification of proteins-extended  
702 database. *Nucleic Acids Res.* **47**, D475-D481 (2019).

- 703 56. N. K. Fox, S. E. Brenner, J. M. Chandonia, SCOPe: Structural Classification of  
704 Proteins--extended, integrating SCOP and ASTRAL data and classification of new  
705 structures. *Nucleic Acids Res.* **42**, D304-309 (2014).
- 706 57. A. Farmer, S. Thibivilliers, K. H. Ryu, J. Schiefelbein, M. Libault, Single-nucleus RNA  
707 and ATAC sequencing reveals the impact of chromatin accessibility on gene expression  
708 in Arabidopsis roots at the single-cell level. *Mol. Plant* **14**, 372-383 (2021).
- 709 58. L. Han *et al.*, Single-cell atlas of a non-human primate reveals new pathogenic  
710 mechanisms of COVID-19. *BioRxiv preprint* 10.1101/2020.04.10.022103 (2020).
- 711 59. C. Liu *et al.*, A portable and cost-effective microfluidic system for massively parallel  
712 single cell transcriptome profiling. *BioRxiv preprint* 10.1101/818450 (2019).
- 713 60. N. Provar, T. Zhu, A browser-based functional classification superViewer for  
714 Arabidopsis genomics. *Curr. Comput. Mol. Biol.* 271-272 (2003).
- 715

716 **Figures and Tables**

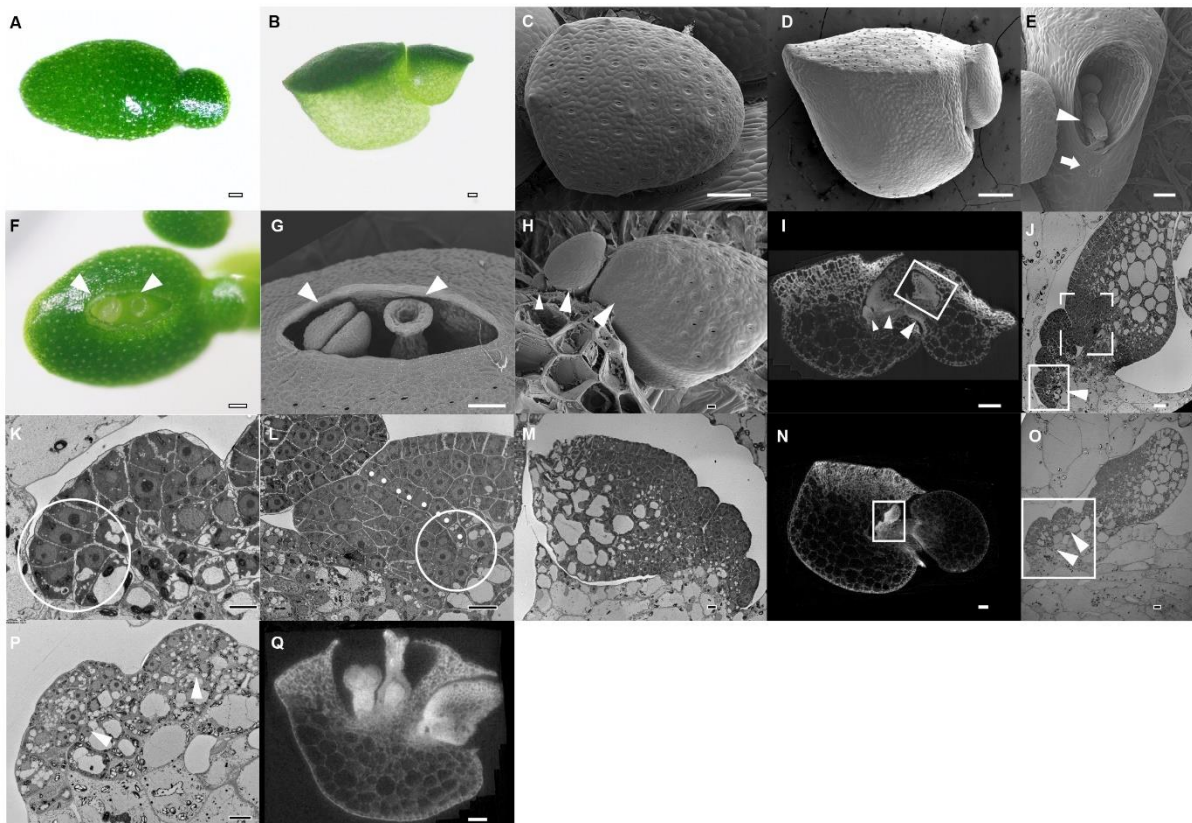

717  
718 **Fig. 1.** Morphological description of *W. australiana*. (A) Top view of a *W. australiana* plantlet,  
719 as seen under a dissecting microscope; a branch is protruding to the right. (B) Side view of a  
720 *W. australiana* plantlet, showing a boat-shaped leaf with dark green cells at the “deck” and  
721 light green cells at the “hull.” (C) Top view of a *W. australiana* plantlet by cryo-SEM; note the  
722 presence of stomata. (D) Side view of a *W. australiana* plantlet by cryo-SEM; no stomata were  
723 observed. (E) View from the hole from which branches abscise out, showing the remaining  
724 petiole (arrowhead). A scar (arrow) forms on the boat-shaped leaf and indicates prior branch  
725 abscission. (F) Top view of a *W. australiana* plantlet under a dissecting microscope, showing  
726 the stigma and stamen (arrowheads) protruding from the crack on the “deck.” (G) Top view of  
727 the crack region of a *W. australiana* plantlet, as seen by cryo-SEM, showing a stigma (right,  
728 arrowhead) and a stamen (left, arrowhead). (H) After peeling the deck, three young leaves (the  
729 biggest one has developed into a branch) are aligned sequentially, as indicated by three  
730 arrowheads. (I) Computed tomography (CT) image showing the alignment of leaves  
731 (arrowheads) and how the biggest leaf has developed into a branch before abscission (the  
732 rectangle shows new leaves produced from the biggest leaf). (J) Transmission electron  
733 microscopy (TEM) section of the leaf primordia and the region including the growth tip  
734 (rectangle with arrowhead). (K) Zoomed-in region indicated by the solid rectangle shown in J.  
735 The circle highlights the cells with big nuclei and dense cytoplasm, possible including the  
736 growth tip cell(s). (L) Zoomed-in region indicated by the dashed rectangle in J with adjusted  
737 orientation. The dotted line indicates the border of the fast-growing region of the primordium  
738 leaf that overlaps with the slow-growing region. The circle indicates the junction where a  
739 growth tip of the primordium leaf might initiate *de novo*, which allows a primordium leaf to  
740 become a new branch. (M) TEM section of the growth region of the branch (prepared with the  
741 CT sample, corresponding to the corresponding rectangle in Fig. 1I). (N) CT image showing a  
742 region of the growth tip of a plantlet under flower induction conditions. The rectangle  
743 highlights the growth region for further observation. (O) TEM section of the growth region

744 (prepared with the CT sample, corresponding to the corresponding rectangle in Fig. 1N). Two  
745 bumps (arrowheads) arise from the innermost region of the cavity. (P) Further enlargement of  
746 the region highlighted in Fig. 1O. Arrowheads indicate cells in the bumps that are  
747 morphologically different from those shown in Fig. 1K. (Q) CT image showing a gynoecium  
748 (right) and a stamen (left) inside the plantlet, possibly derived from the two bumps observed in  
749 Fig. 1P. Bars = 100  $\mu\text{m}$  (A, B, C, D, E, F, G, I, N, Q) and 10  $\mu\text{m}$  (H, J, K, L, M, O, P).  
750



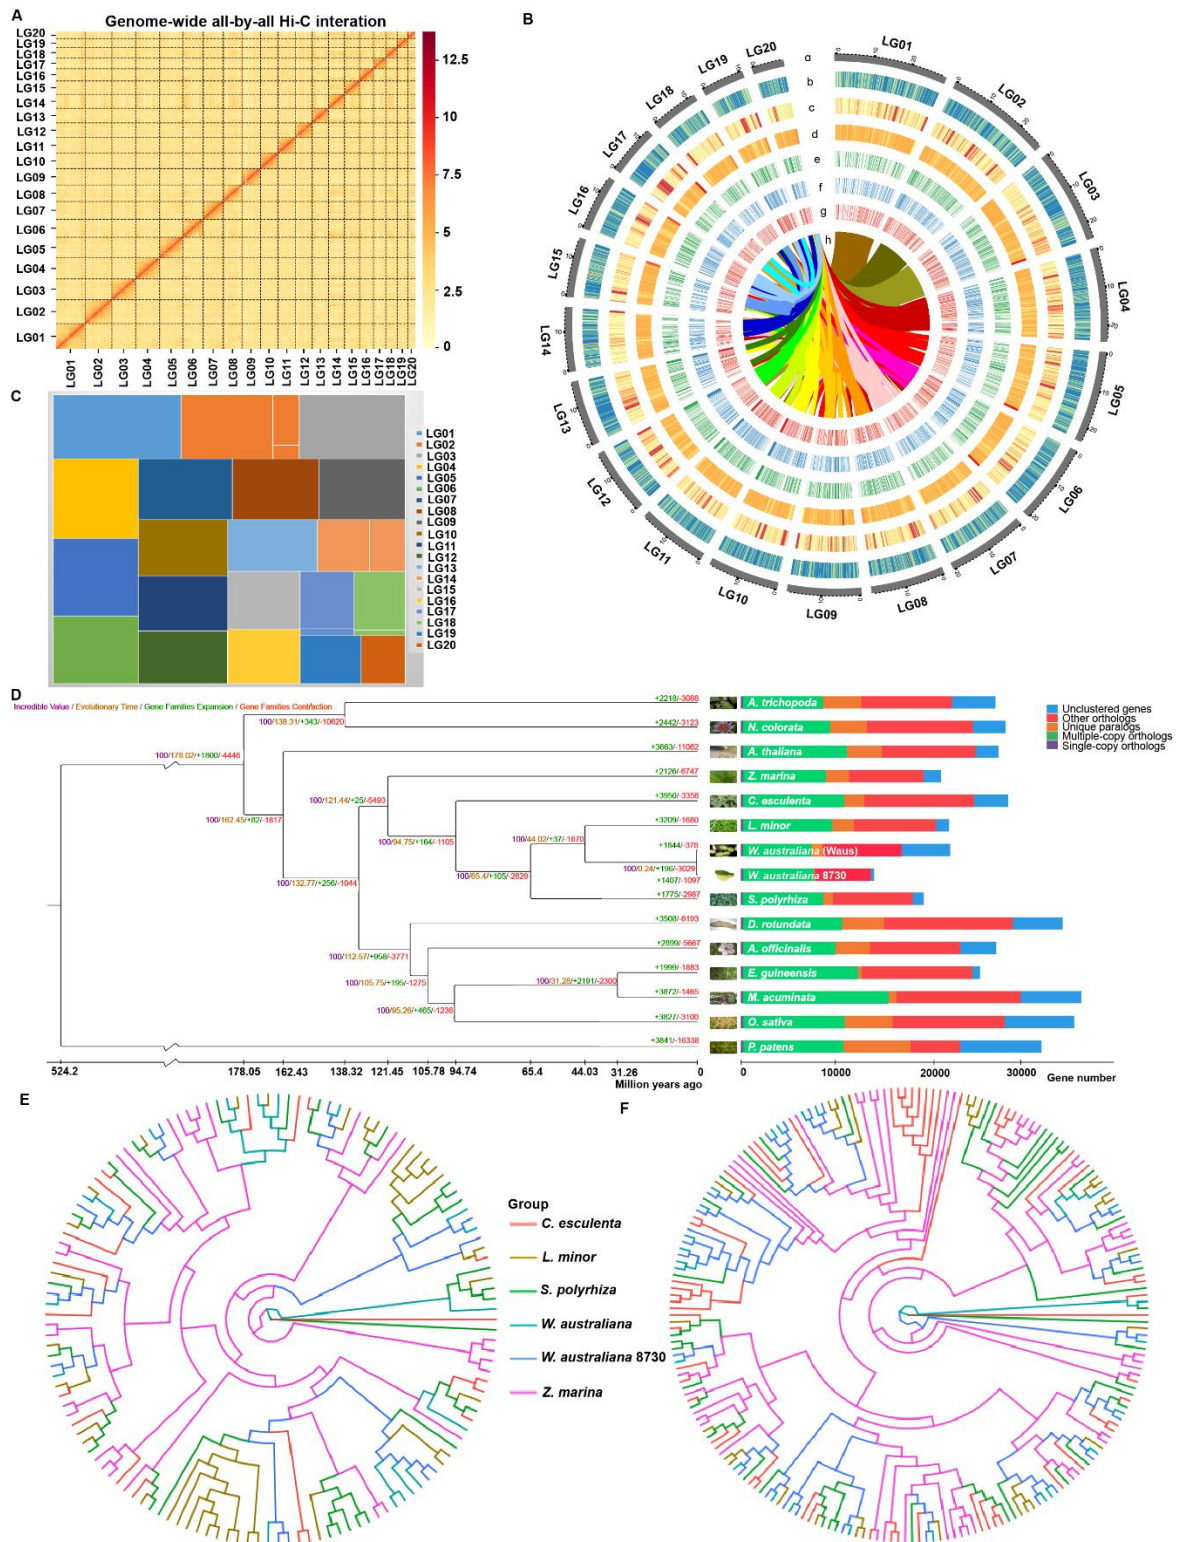

751

752

753

754

755

756

757

758

759

**Fig. 2.** Genomic features of the *W. australiana* genome and gene family evolution in *W. australiana*. (A) Hi-C interaction Matrix for the 20 *W. australiana* pseudo-chromosomes. (B) Circos plot of the *W. australiana* genomic features: a, distribution of 20 chromosomes (each bar represents one chromosome, and the number represents the chromosome length); b, gene density; c, repeat sequence density; d, GC contents; e, gene density of Control transcriptome; f, gene density of Flowered transcriptome; g, gene density of Induced transcriptome. h, synteny and distribution of genomic regions across the *W. australiana* genome. (C) Treemap for contig

760 length difference of 20 chromosomes. (D) Phylogenetic analysis of *W. australiana* and other  
761 plants. The single-cell green alga *Chlamydomonas reinhardtii* was used as outgroup. The value  
762 on each node represents the divergence time in millions of years (mya). Nodes marked red are  
763 published fossil calibration time points. Numbers marked in green/red represent  
764 expansion/contraction numbers on each branch. Photos on the right show the corresponding  
765 species. (E) *AGAMOUS-LIKE (AGL)* flowering-related genes. (F) Root-related *small auxin*  
766 *upregulated RNA (SAUR)* genes.  
767

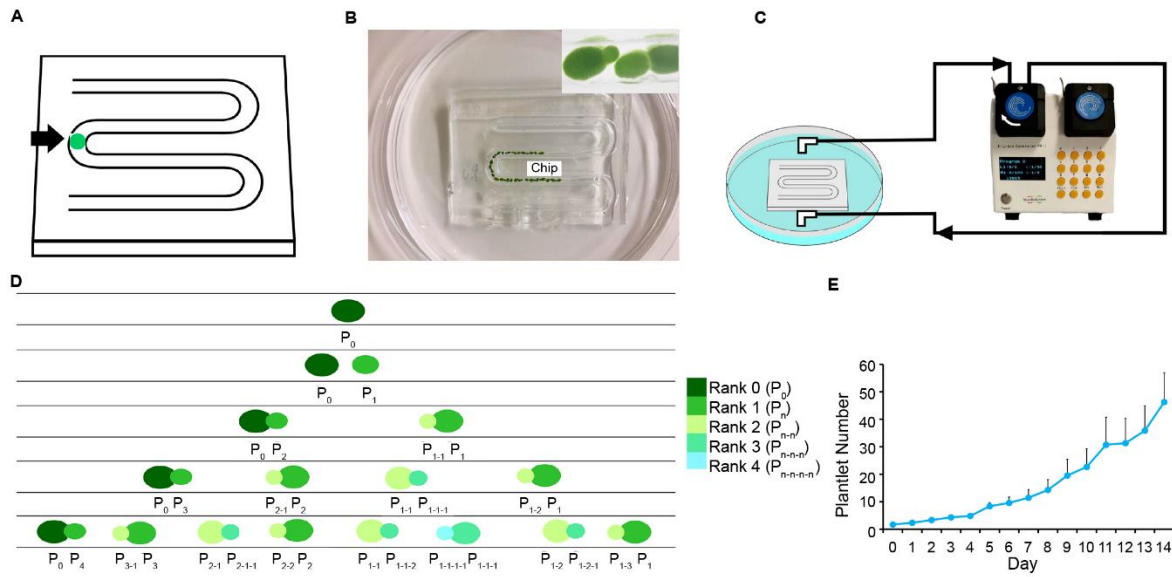

768  
 769  
 770  
 771  
 772  
 773  
 774  
 775

**Fig. 3.** Plant-on-Chip culture platform. (A) Representative millifluidic chip (detailed information in Methods), showing a loaded plantlet. (B) Abscised plantlets (former branch) line up along the channel. (C) A peristaltic pump is connected to the chip to circulate liquid half-strength MS medium. (D) Diagram of growth pattern; the branch ranks are indicated by different colors. (E) Growth curve of cultured plantlets in the PoC in half-strength MS medium under SD conditions at 26 °C (n = 3).



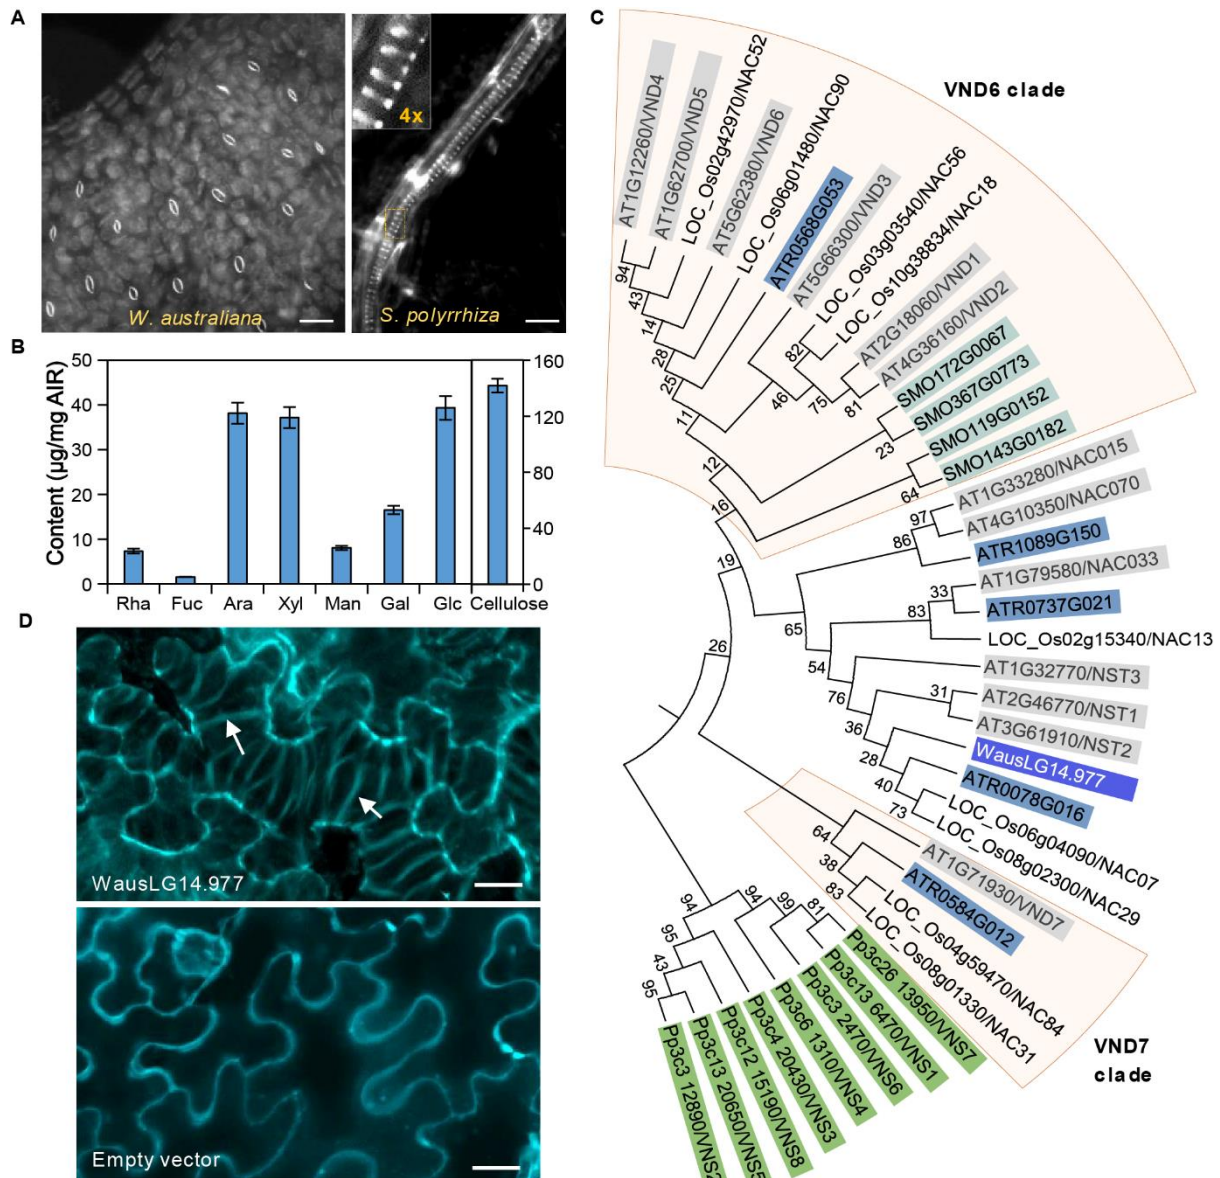

776  
 777 **Fig. 4.** *W. australiana* lacks vasculature. (A) Staining of *W. australiana* and *S. polyrrhiza*  
 778 plantlets with the cell wall dye Direct Red 23, revealing no SCW vascular structure in *W.*  
 779 *Australiana*, in contrast to the spiral-like xylem cells (inset) observed in the closely related  
 780 duckweed *S. polyrrhiza*. Bars = 80 µm (left) and 20 µm (right). (B) Cell wall composition of *W.*  
 781 *australiana* plantlets. All components are shown with the scale to the left, except cellulose  
 782 (right scale). Bar charts represent the mean ± standard deviation (SD) of five biological  
 783 replicates. (C) Phylogenetic analysis of SCW-related NAC homologs in *W. australiana* and  
 784 five representative genomes, indicating the absence of the VND homolog (boxed) in *W.*  
 785 *australiana*. Pp, *Physcomitrium patens*; SMO, *Selaginella moellendorffii*; ATR, *Amborella*  
 786 *trichopoda*; Os, *Oryza sativa*; AT, *Arabidopsis thaliana*. (D) Confocal images of *Nicotiana*  
 787 *benthamiana* leaf epidermal cells transiently overexpressing WausLG14.977 or infiltrated with  
 788 empty vector. Vessel-like cells were observed with WausLG14.977. Arrows indicate spiral  
 789 SCW bands in a vessel-like cell. SCW, Secondary cell wall. Bars = 20 µm.  
 790



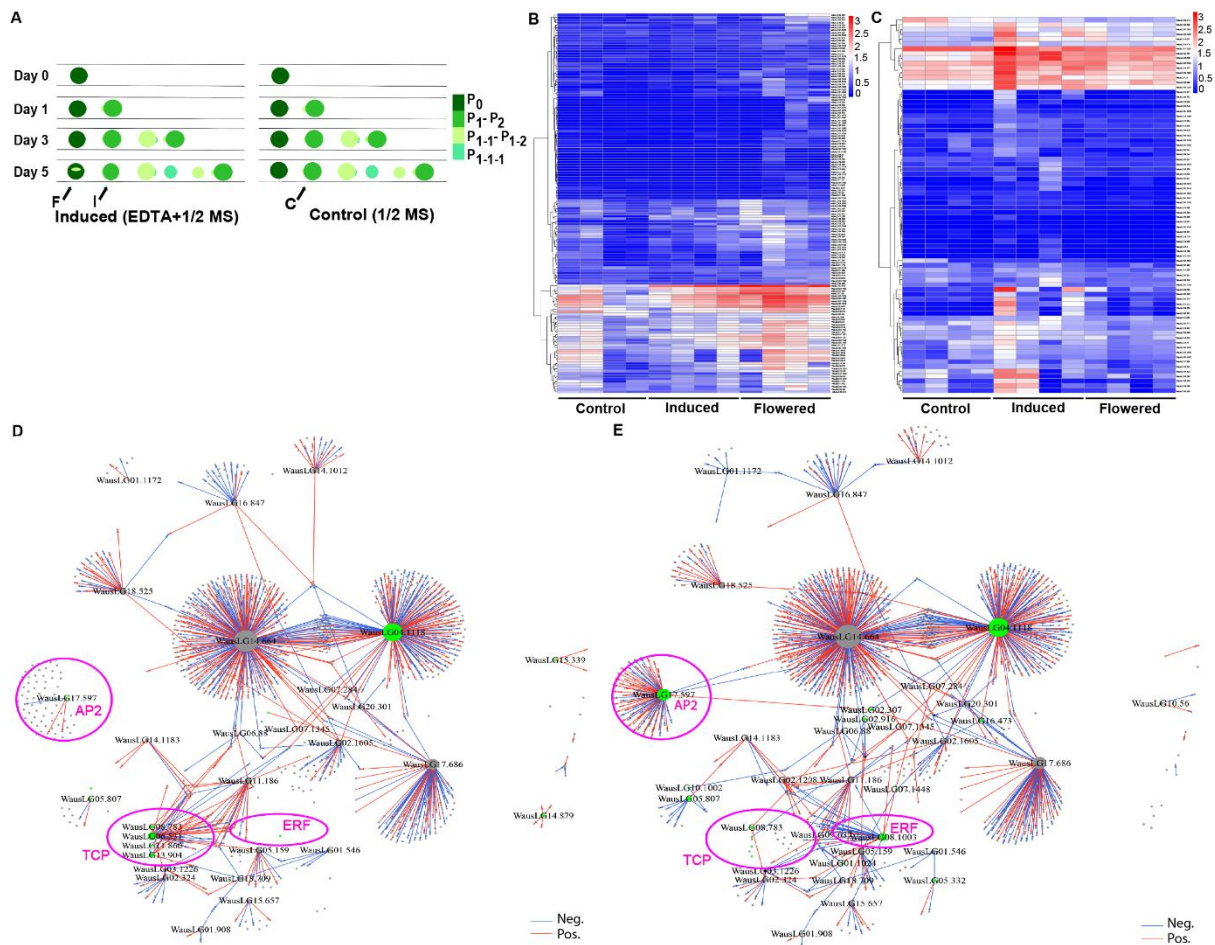

791  
792 **Fig. 5.** *W. australiana* floral induction and related transcriptome/transcription regulatory  
793 networks. (A) Diagram of the sampling design: F (flowered) samples were collected 5 days  
794 after culture under inductive conditions (left) from plantlets with a crack on the deck (shown  
795 as F with arrow). I (induced) samples were collected 5 days after culture under inductive  
796 conditions (left) from plantlets with no crack on the deck (shown as I with arrow). C (control)  
797 samples were collected 5 days after culture under non-inductive conditions (right, control) from  
798 plantlets (shown as C with arrow) remaining in a vegetative state. (B) Heatmap representation  
799 of 147 differentially expressed genes that are upregulated in Flowered compared to Induced  
800 (fold change  $\geq 2$  or  $\leq -2$ ,  $P \leq 0.05$ ). (C) Heatmap representation of 78 differentially expressed  
801 genes that are downregulated in Flowered compared to Induced (fold change  $\geq 2$  or  $\leq -2$ ,  $P \leq$   
802  $0.05$ ). (D) TRN topological structure based on the comparison of the RNA-seq datasets from I  
803 and C samples. (E) TRN topological structure based on the comparison of the RNA-seq  
804 datasets from F and C samples. Red edges for positive regulation, blue edges for negative  
805 regulation, green nodes for differentially present genes, circled region for differentially present  
806 network in D and E. Pink circles highlight the nodes exhibiting topological differences between  
807 the two TRNs.

808

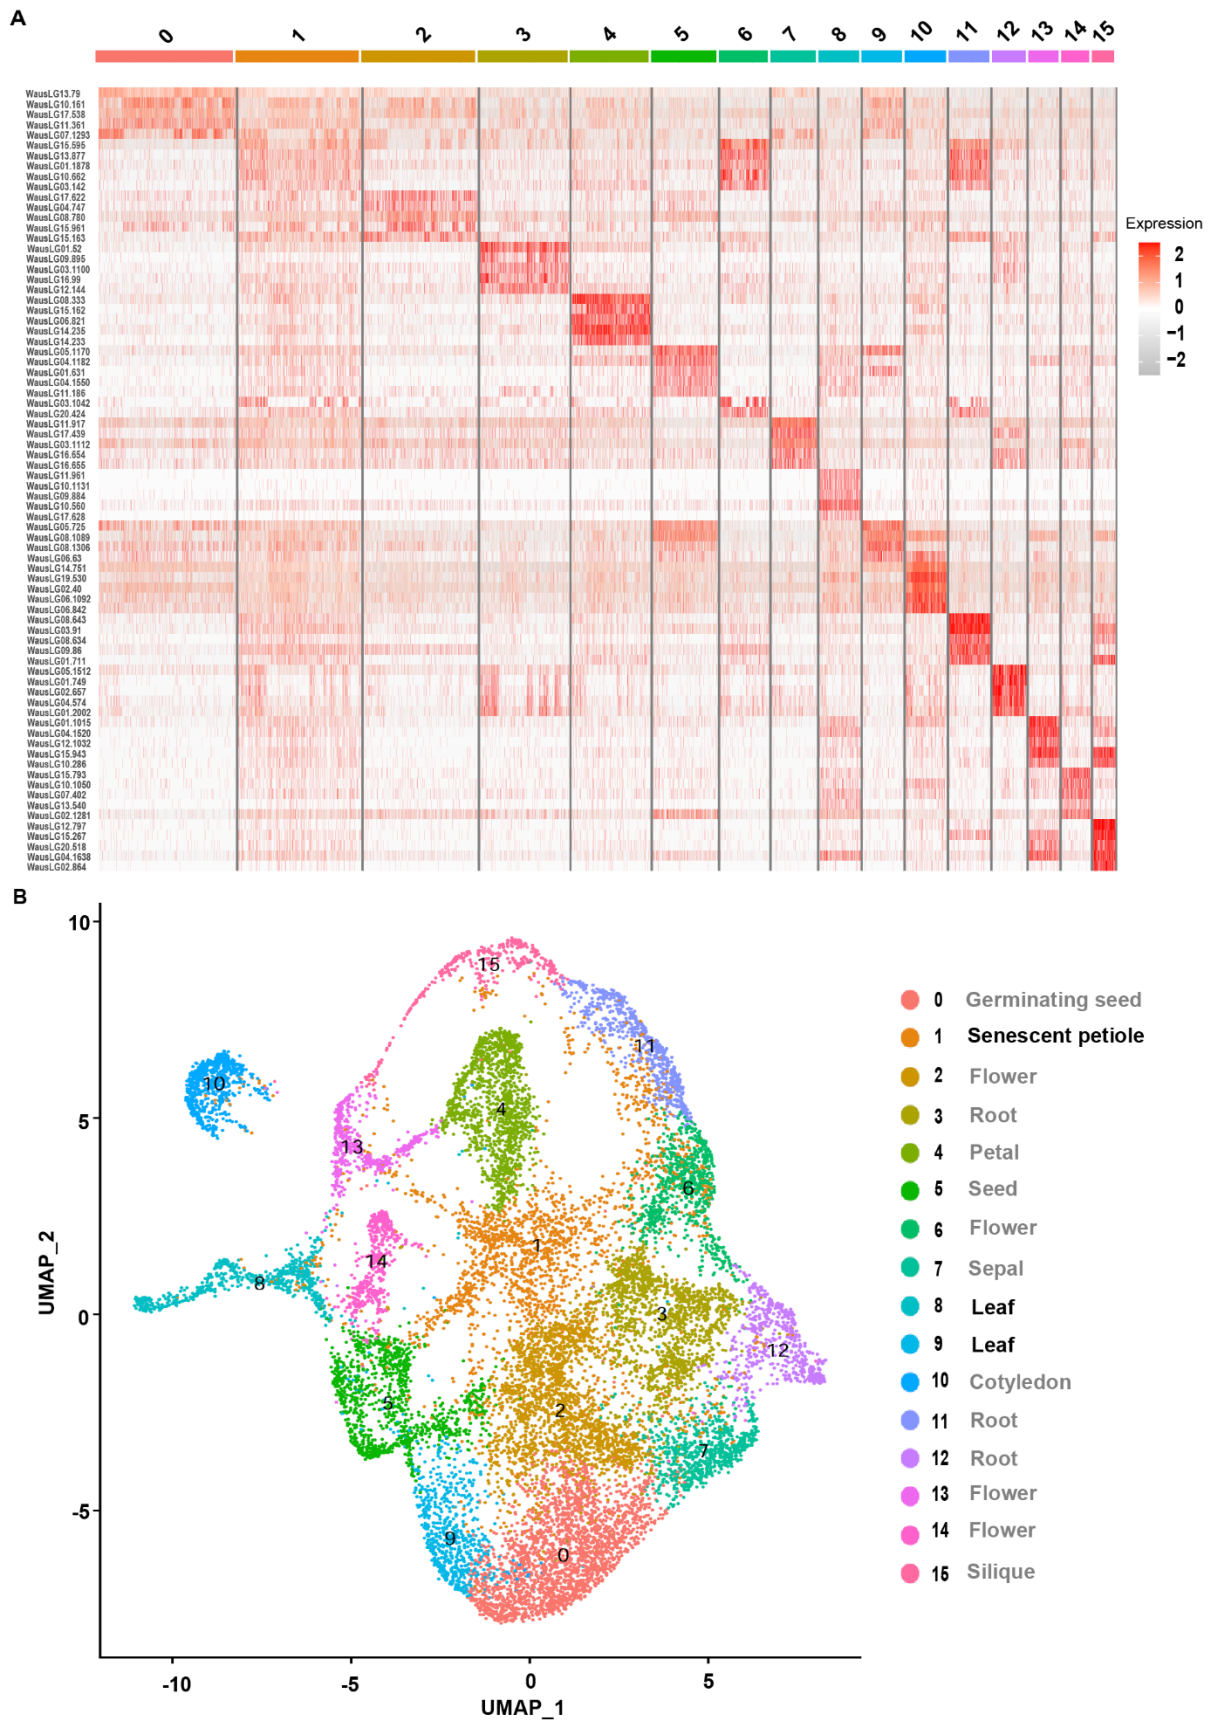

809  
810

811 **Fig. 6.** snRNA-seq reveals cell types absent in *W. australiana* plantlets. (A) Heatmap  
812 representation of differentially expressed genes across 15,983 cells clustered into 16 cell types.

813 (B) UMAP visualization of 15,983 cells into 16 clusters (for detailed information, see Dataset,  
814 Table S16).  
815

816 **Table 1. Statistics of *W.a.* genome assembly comparison**

| Name                  | Waus        | wa7733 (16) | wa8730 (16) | wa8730 (17) |
|-----------------------|-------------|-------------|-------------|-------------|
| Total length (bp)     | 358,772,296 | 359,766,217 | 337,899,876 | 456,810,926 |
| Contig number         | 25          | 2,578       | 5,250       | 1,757       |
| Contig N50 (bp)       | 18,161,740  | 256,298     | 102,418     | 734,533     |
| Longest contig (bp)   | 28,936,433  | 1,664,978   | 679,034     | 7,663,058   |
| Scaffold number       | 20          | 2,578       | 5,250       | 1,508       |
| Scaffold N50 (bp)     | 18,579,918  | 836,551     | 109,493     | 1,169,370   |
| Longest scaffold (bp) | 28,936,433  | 5,333,369   | 1,714,878   | 8,358,235   |
| BUSCO                 | 94.55%      | 77.10%      | 80.29%      | ~87% (?)    |
| Mapping TGS           | 99.50%      | 98%         | 96%         | NA          |
| Mapping NGS           | 99.80%      | 98%         | 95%         | NA          |
| Genome size (Mb)      | 358.8       | 359.8       | 337.9       | ~456.       |
| Protein-coding genes  | 22,484      | 15,312      | 14,324      | 22,293      |

817
